# Supplementary material for: Effects of enalapril and paricalcitol treatment on diabetic nephropathy and renal expressions of TNF-α, p53, caspase-3 and Bcl-2 in STZ-induced diabetic rats
Source: PLOS journal article supplement (doi:10.1371/journal.pone.0214349), 2019-09-17
Supplement: S6 (10.1371/journal.pone.0214349.s006) [file journal.pone.0214349.s006]

**Table 6: Effects of enalapril and paricalcitol on serum insulin and C-peptide levels in diabetic rats.**

|                                                  | <b>Insulin<br/>(ng/ml)</b> | <b>%<br/>change</b> | <b>C-peptide<br/>(ng/ml)</b> | <b>%<br/>change</b> |
|--------------------------------------------------|----------------------------|---------------------|------------------------------|---------------------|
| Normal                                           | 2.633 ± 0.111 <sup>a</sup> | -                   | 4.733 ± 0.264 <sup>a</sup>   | -                   |
| Diabetic control                                 | 0.606 ± 0.189 <sup>c</sup> | -76.98              | 0.774 ± 0.109 <sup>c</sup>   | -83.64              |
| Diabetic treated with Enalapril                  | 1.833 ± 0.152 <sup>b</sup> | 202.47              | 4.776 ± 0.097 <sup>a</sup>   | 517.05              |
| Diabetic treated with Paricalcitol               | 1.413 ± 0.195 <sup>b</sup> | 133.16              | 4.200 ± 0.146 <sup>a</sup>   | 442.63              |
| Diabetic treated with Enalapril and Paricalcitol | 1.640 ± 0.204 <sup>b</sup> | 170.62              | 3.240 ± 0.427 <sup>b</sup>   | 317.70              |
| F-probability                                    | P<0.001                    |                     | P<0.001                      |                     |
| LSD at 5% level                                  | 0.5063                     |                     | 0.7084                       |                     |
| LSD at 1% level                                  | 0.6850                     |                     | 0.9854                       |                     |

- Data are expressed as mean ± SE. Number of detected samples in each group is six.
- Means, which share the same superscript symbol(s) are not significantly different.
- Percentage changes were calculated by comparing diabetic control group with normal control group and diabetic treated groups with diabetic control group.
