# Supplementary material for: Effects of enalapril and paricalcitol treatment on diabetic nephropathy and renal expressions of TNF-α, p53, caspase-3 and Bcl-2 in STZ-induced diabetic rats
Source: PLOS journal article supplement (doi:10.1371/journal.pone.0214349), 2019-09-17
Supplement: S8 (10.1371/journal.pone.0214349.s008) [file journal.pone.0214349.s008]

**Table 8: Stained area percent for the expression of TNF- $\alpha$ , p53, caspase-3 and Bcl-2 in kidney of normal, diabetic control and diabetic groups treated with enalapril, paricalcitol and their mixture.**

|                                                  | <b>TNF-<math>\alpha</math></b> | <b>p53</b>                      | <b>Caspase-3</b>               | <b>Bcl-2</b>                    |
|--------------------------------------------------|--------------------------------|---------------------------------|--------------------------------|---------------------------------|
| Normal                                           | 0.096 $\pm$ 0.022 <sup>b</sup> | 0.654 $\pm$ 0.140 <sup>c</sup>  | 0.342 $\pm$ 0.169 <sup>c</sup> | 8.637 $\pm$ 0.511 <sup>b</sup>  |
| Diabetic control                                 | 2.916 $\pm$ 0.328 <sup>a</sup> | 14.774 $\pm$ 2.338 <sup>a</sup> | 5.082 $\pm$ 1.118 <sup>a</sup> | 1.148 $\pm$ 0.107 <sup>c</sup>  |
| Diabetic treated with Enalapril                  | 0.195 $\pm$ 0.070 <sup>b</sup> | 0.553 $\pm$ 0.167 <sup>c</sup>  | 0.330 $\pm$ 0.010 <sup>c</sup> | 7.678 $\pm$ 0.747 <sup>b</sup>  |
| Diabetic treated with Paricalcitol               | 0.518 $\pm$ 0.170 <sup>b</sup> | 5.062 $\pm$ 0.788 <sup>b</sup>  | 2.844 $\pm$ 0.365 <sup>b</sup> | 8.448 $\pm$ 1.335 <sup>b</sup>  |
| Diabetic treated with Enalapril and Paricalcitol | 0.133 $\pm$ 0.413 <sup>b</sup> | 0.701 $\pm$ 0.171 <sup>c</sup>  | 0.194 $\pm$ 0.042 <sup>c</sup> | 15.121 $\pm$ 3.518 <sup>a</sup> |
| F-probability                                    | P<0.001                        | P<0.001                         | P<0.001                        | P<0.01                          |
| LSD at 5% level                                  | 0.535                          | 3.498                           | 1.675                          | 5.455                           |
| LSD at 1% level                                  | 0.761                          | 4.976                           | 2.382                          | 7.759                           |

- Data are expressed as mean  $\pm$  SE. Number of replicates in each group is 3.
- Means, which share the same superscript symbol(s) are not significantly different.
